# Supplementary material for: Frequencies of VKORC1-1639G>A and rs397509427 in Patients on Warfarin and Healthy Syrian Subjects
Source: Hindawi journal article supplement (doi:10.1155/2023/8898922), 2023-11-23
Supplement: f1 [file 8898922.f1.pdf]

**Table S1. Classification of patients according to warfarin indications (n=94)**

| <b>Indications</b>  | <b>No. of patients</b> | <b>Percentage</b> |
|---------------------|------------------------|-------------------|
| VTE (DVT and/or PE) | 57                     | 60.6%             |
| HVR                 | 30                     | 31.9%             |
| Ischemic Stroke     | 4                      | 4.3%              |
| Atrial Fibrillation | 3                      | 3.2%              |

VTE: venous thromboembolism, DVT: deep vein thrombosis, PE: pulmonary embolism, HVR: heart valve replacement.
