# Supplementary material for: Frequencies of VKORC1-1639G>A and rs397509427 in Patients on Warfarin and Healthy Syrian Subjects
Source: Hindawi journal article supplement (doi:10.1155/2023/8898922), 2023-11-23
Supplement: f2 [file 8898922.f2.pdf]

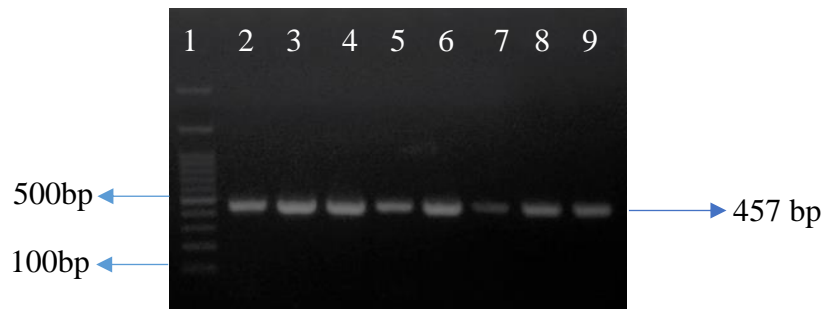

**Figure S2.1. A representative gel electrophoresis of PCR products encompassing the VKORC1 -1639G>A polymorphism.**

Lane 1, a 100 base-pair DNA marker ladder.

Lanes 2 to 9, PCR products with the expected length of 457bp representing eight subjects.

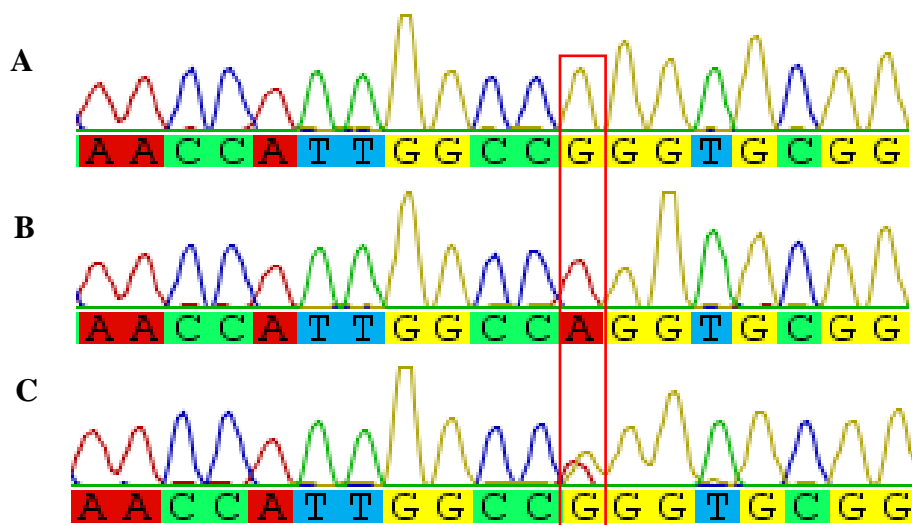

**Figure S2.2. Sequencing chromatograms showing examples of wild-type GG (A); homozygote AA (B), and heterozygote GA (C) of the VKORC1 -1639G>A polymorphism.**

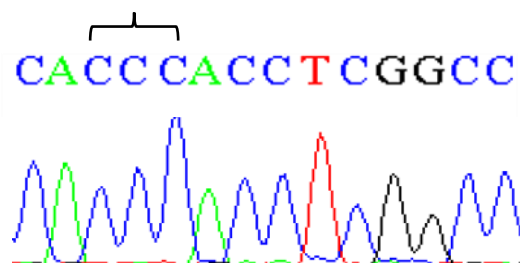

**Figure S2.3. Sequencing chromatogram for VKORC1 rs397509427.**

All samples in our study were wild-type and did not have the insertion of a fourth C nucleotide
