# Supplementary material for: Frequencies of VKORC1-1639G>A and rs397509427 in Patients on Warfarin and Healthy Syrian Subjects
Source: Hindawi journal article supplement (doi:10.1155/2023/8898922), 2023-11-23
Supplement: f3 [file 8898922.f3.pdf]

**Table S2. Frequencies of the observed VKORC1-1639G>A genotypes and those expected from Hardy-Weinberg Equilibrium (HWE) in patients on warfarin and healthy subjects.**

| Genotype  | Patients on warfarin (n=94) |          |                       | Healthy Subjects (n=44) |          |                       |
|-----------|-----------------------------|----------|-----------------------|-------------------------|----------|-----------------------|
|           | observed                    | expected | HWE<br><i>P</i> value | observed                | expected | HWE<br><i>P</i> value |
| <b>GG</b> | 19                          | 26.6     | 0.002                 | 3                       | 11       | <0.001                |
| <b>GA</b> | 62                          | 46.8     |                       | 38                      | 22       |                       |
| <b>AA</b> | 13                          | 20.6     |                       | 3                       | 11       |                       |
